# Supplementary material for: Tuning the crystalline and mesophase structure of olefin block copolymer through self-nucleation and annealing treatments
Source: Royal Society of Chemistry journal article supplement (doi:10.1039/c5cp00548e), 2015-01-01
Supplement: c5cp00548e1.pdf [file c5cp00548e1.pdf]

*Supplementary Information for*

## **Tuning the crystalline and mesophase structure of olefin block copolymer through self-nucleation and annealing treatments**

Jiashu Fan, Qinglong Zhang, Jiachun Feng\*

*State Key Laboratory of Molecular Engineering of Polymers, Collaborative Innovation Center of Polymers and Polymer Composite Materials, Department of Macromolecular Science, Fudan University, Shanghai 200433, China.*

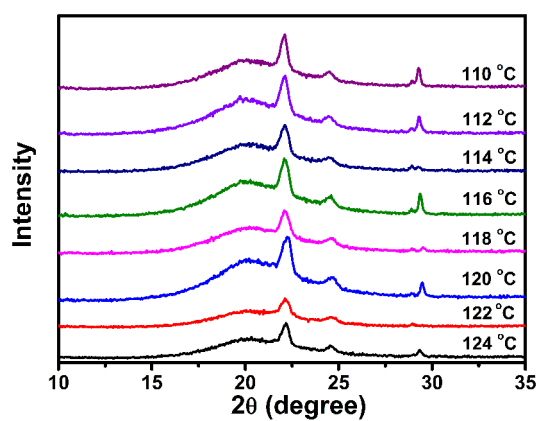

Figure S1. WAXD results of OBCs annealed at different temperatures.
